1 **Genomic investigation of a suspected multi-drug resistant *Klebsiella pneumoniae* outbreak in**  
2 **a neonatal care unit in sub-Saharan Africa**

3 **Jennifer Cornick<sup>1,2</sup>, Patrick Musicha<sup>3,4</sup>, Chikondi Peno<sup>1,5</sup>, Ezgi Saeger<sup>6</sup>, Pui-ying Iroh Toh<sup>1,7</sup>,**  
4 **Aisleen Bennett<sup>1,8</sup>, Neil Kennedy<sup>9,10</sup>, Nicholas Feasey<sup>1,7</sup>, Eva Heinz<sup>7</sup>, Amy K. Cain<sup>1,7,11</sup>**

- 5 1. Malawi-Liverpool-Wellcome Trust, Clinical Research Programme, Blantyre, Malawi  
6 2. Institute of Infection and Global Health, University of Liverpool, Liverpool, United  
7 Kingdom  
8 3. Mahidol-Oxford Tropical Medicine Research Unit, Mahidol University, Bangkok, Thailand  
9 4. Centre for Tropical Medicine and Global Health Nuffield Department of Medicine,  
10 University of Oxford, Oxford, United Kingdom  
11 5. Centre for Inflammation Research, Queen's Medical Research Institute, University of  
12 Edinburgh, Edinburgh, United Kingdom  
13 6. Department of Paediatrics, Russell's Hall Hospital, Dudley, United Kingdom  
14 7. Liverpool School of Tropical Medicine, Liverpool, United Kingdom.  
15 8. Institute for Infection and Immunity, St George's, University of London, United Kingdom  
16 9. Department of Paediatrics, College of Medicine, University of Malawi, Malawi  
17 10. Centre for Medical Education, Queen's University Belfast, Ireland  
18 11. Department of Molecular Sciences, Macquarie University, Sydney, Australia

19  
20 \*=Corresponding authors. Emails: Amy K. Cain ([amy.cain@mq.edu.au](mailto:amy.cain@mq.edu.au)) and Jennifer Cornick  
21 ([J.cornick@liverpool.ac.uk](mailto:J.cornick@liverpool.ac.uk))

22

23 **Running head (short title): *Klebsiella pneumoniae* outbreak in a Malawian neonatal unit**

24 **Key words:** Antimicrobial resistance, *Klebsiella pneumoniae*, bloodstream infections, hospital  
25 outbreak, multi-drug resistance, infection, neonatal, sub-Saharan Africa, genome, sequencing.

26 **ABSTRACT:** A suspected outbreak of multi-drug resistant (MDR) *Klebsiella pneumoniae* in a  
27 Malawian neonatal unit was investigated using whole-genome sequencing. Strain-types,  
28 virulence and resistance genes of *K. pneumoniae* isolated from patients from the hospital over a  
29 four-year period were identified. A MDR ST340 clone was implicated as the likely outbreak  
30 cause.

31 **ABBREVIATIONS:** Blood stream infection (BSI); Extended spectrum beta-lactamase (ESBL);  
32 Multi-drug resistance (MDR); Multi locus sequence type (MLST); Sequence type (ST); Queen  
33 Elizabeth Central Hospital (QECH).

34 **BODY:** *Klebsiella pneumoniae* is an opportunistic pathogen, responsible for an increasing  
35 burden of hospital-acquired infections globally. It has the ability to readily acquire antimicrobial  
36 resistance mechanisms, with sequence types (STs), ST258, ST11, ST14/15 and ST405, reported  
37 to cause a large proportion of cephalosporin- and carbapenem-resistant infections with high  
38 mortality [1]. Critically, sepsis caused by multi-drug resistant (MDR) *K. pneumoniae* is a growing  
39 challenge in neonatal care units; a recent systematic review of extended spectrum beta-  
40 lactamase (ESBL) producing Enterobacteriaceae in neonatal care units reported that ESBL *K.*  
41 *pneumoniae* is the pathogen most frequently responsible for outbreaks in these settings, and is  
42 associated with a mortality rate of 31% [2]. There are multiple reports detailing the prevalence  
43 and genetic epidemiology of MDR *K. pneumoniae* causing hospital outbreaks in high-income  
44 settings [3]. However, reports from low- and middle-income settings, where such data are of  
45 immense value in implementing appropriate infection prevention control and treatment  
46 regimes, are scarce.

47  
48 Chatinkha is a 70-bed neonatal special care unit at Queen Elizabeth Central Hospital (QECH),  
49 the biggest government referral hospital in Southern Malawi. Given that Chatinkha  
50 predominantly admits neonates born at QECH with complications, the majority of blood stream  
51 infections (BSI) diagnosed on this unit are considered to be hospital acquired. At QECH, all  
52 children with clinically suspected sepsis undergo a blood culture (BC) test [4]. The BC service  
53 typically identifies <2 *K. pneumoniae* BSI on Chatinkha each month, however a spike in cases

54 was observed in February (n=7) and March (n=9) 2014. The number of cases temporarily  
55 decreased, however September to November 2014 showed a second peak in cases (Figure  
56 TA1). Despite Chatinkha having the smallest capacity of all of the paediatric wards at QECH,  
57 from February to November 2014 over 75% of all paediatric *K. pneumoniae* BSI (n=33/43) were  
58 from neonates admitted to Chatinkha. This rise was not due to an increase in the number of  
59 blood cultures taken, which remained stable (Fig 1A). Furthermore, *K. pneumoniae* BSI in  
60 Chatinkha during this period were untreatable with locally available antibiotics; most displayed  
61 identical antimicrobial resistance profiles, suggesting the possibility of a clonal outbreak.

62 Here, we performed a genomic investigation into the suspected *K. pneumoniae* outbreak,  
63 sequencing genomes from February to November 2014 (boxed in Fig TA1). All viable, archived  
64 *K. pneumoniae* BSI isolates from Chatinkha (n=62) and a subset of *K. pneumoniae* BSI isolates  
65 (n=38) from other paediatric wards isolated January 2012 to December 2015, were whole  
66 genome sequenced using the Illumina HiSeq X-Ten platform. Fourteen sequenced genomes  
67 failed initial quality control, the remaining 86 samples (Chatinkha n=56, other wards n=30)  
68 yielded on average 2.3 million reads/sample. The sequences were deposited in the European  
69 Nucleotide Archive under project numbers PRJEB19322 and PRJNA641987. Isolates were  
70 previously subjected to antibiotic susceptibility testing using the discs diffusion method and  
71 BSAC guidelines [4].

72 Multilocus sequence (MLST) typing was performed *in silico* as described elsewhere [5].  
73 Resistance genes were identified using SRST2 [6], plasmids using PBRT [7], capsular type using  
74 Kaptive and virulence genes using Kleborate v0.3.0 (<https://github.com/katholt/Kleborate>). In  
75 order to place the study dataset within a global context, we added our genomes to a dataset  
76 from an international *K. pneumoniae* study [1]. A core gene alignment of the combined  
77 genomic dataset was generated using ROARY [8] and from this, single nucleotide variants were  
78 used to generate a phylogeny with RaxML v.7.8.6 [9]. Patient records were retrospectively  
79 analysed to establish mortality outcomes. Ethical approval for the study was awarded by the  
80 College of Medicine Research Ethics Committee (P.08/14/1614 and P.018/17/2255).

81 Whole genome sequencing analysis identified two lineages, ST340 and ST14, as the dominant *K.*

82 *pneumoniae* STs recovered from neonates admitted to Chatinkha (Fig TA1).

83 **There was a discreet outbreak of MDR ST340.** ST340, an ST within the CG258 complex that has  
84 been associated with MDR hospital infections worldwide [10,11], accounted for almost a third  
85 (30%, n=17/56) of all *K. pneumoniae* isolated from Chatinkha during the study period. All ST340  
86 isolates were capsular type 15 and serotype O4 and differed from one another by  $\leq 30$  SNPs (Fig  
87 TA2), indicating that a single ST340 lineage was circulating in the ward over the entire study  
88 period. Over the suspected outbreak period, ST340 accounted for more than half of the *K.*  
89 *pneumoniae* BSI from Chatinkha (58%, n=14/24), strongly suggesting that dissemination of this  
90 clonal strain within Chatinkha was responsible for the peak in BSI observed from February to  
91 November 2014. The ST340 were resistant to augmentin, ampicillin, ceftriaxone,  
92 chloramphenicol, ciprofloxacin, cotrimoxazole, gentamicin and susceptible to amikacin, an  
93 antibiotic not local available. Consistent with this, all ST340 isolates harboured multiple  
94 antibiotic resistance genes, conserved between all ST340 isolates, namely *bla*<sub>CTX-M-15</sub>, *bla*<sub>OXA-1</sub>,  
95 *bla*<sub>OXA-2</sub>, *bla*<sub>OXA-16</sub>, *bla*<sub>SHV-11</sub>, *bla*<sub>TEM-1</sub> (beta-lactams), *aac*(6')-Ib-cr (quinolone), *strAB*  
96 (streptomycin), *sul1* (sulphonamides), *catA1*, *catA2* (phenicols), *tetA*(D) (tetracycline), *aadA1*,  
97 *aadA2*, *aac*(3')-IIa (aminoglycosides), *dfrA1*, *dfrA2* (trimethoprim) and *mph* (macrolides) and a  
98 number of plasmids (see Fig 1B). Of the ST340 BSI cases reported in neonates on Chatinkha,  
99 outcome data was available for 13, of which four died (case fatality rate, 31%).

100

101 Prior to the outbreak, ST340 BSI had only been isolated from Chatinkha on two previous  
102 occasions (May and November 2013) (Fig TA1). These isolates differed from the first two ST340  
103 cases reported in February 2014 by <5 SNPs (Fig TA2), confirming that closely related strains  
104 were circulating in Chatinkha at least six-months prior to the outbreak. Previous to this, ST340  
105 was isolated on a single occasion from two other wards, the earliest in February 2013. These  
106 two ST340s isolates differed from the presumed outbreak ST340 precursor isolate by <7 SNPs.  
107 Whilst we cannot confirm the exact date at which ST340 was seeded into QECH, this indicates  
108 that ST340 was circulating in the hospital at least a year prior to the outbreak. Following the  
109 outbreak, ST340 was identified twice more on Chatinkha. A single case in April 2015 and again a

110 single case in October 2015. October 2015 saw six cases of *K. pneumoniae* BSI identified on  
111 Chatinkha, hinting at the start of another outbreak, however these six cases were caused by  
112 five different STs. The fact ST340 continued to circulate in the ward post November 2014 but  
113 did not contribute to a further peak in cases, suggests that the success of this clone during  
114 the outbreak period was not driven by genomic factors alone.

115 **ST14 did not contribute to the outbreak.** Despite being the second most commonly isolated ST  
116 from Chatinkha (27%, n=15/56) during the study period, only a single ST14 case was reported  
117 during the outbreak period, in March 2014. ST14 showed a greater level of variation in their  
118 resistance profiles relative to ST340, and isolates were predominantly susceptible to  
119 Chloramphenicol and Ciprofloxacin as well as Amikacin (Fig TA2).

120 **ST372 related to a peak in cases.** ST372 (capsular type: 43, serotype: O2V1) also appeared to  
121 contribute to the peak in *K. pneumoniae* BSI over the outbreak period as ST372 was responsible  
122 for 20.8% (n=5/24) of cases. ST372 was first observed in February 2014 in Chatinkha and caused  
123 four BSI in one month and the remaining five *K. pneumoniae* BSIs reported during the outbreak  
124 period belonged to five different STs.

125 **The outbreak strains in a global context.** A core phylogeny was constructed to place isolates  
126 into a global context using a sequencing dataset of diverse *K. pneumoniae* isolates [13] (Fig  
127 TA3). Although no ST340 isolates were present in this dataset, the Malawian ST340 were most  
128 closely related to ST258 isolates from the USA. Interestingly, ST14 strains from Malawi were  
129 clonally related (<100 SNPs) to international isolates with >99.9% identity to isolates from  
130 Australia and the Netherlands, indicating a global spread.

131 **Conclusion.** We studied *K. pneumoniae* BSI isolated from neonates admitted to neonatal unit  
132 over a four-year period, encompassing a suspected outbreak in 2014, as well as a  
133 representative subset of *K. pneumoniae* BSI reported from other paediatric wards within the  
134 same hospital.

135 We show that ST340, and to a lesser extent ST372, caused an increase in BSI reported on the  
136 neonatal ward in 2014. ST340 was observed in other wards prior to the outbreak, suggesting

137 that it was circulating in the hospital prior to the outbreak. ST372 was not identified in other  
138 wards prior to the outbreak, however this may be due to the limitations of our sampling. In  
139 addition to the outbreak lineages we observed a large cluster of ST14 isolates, which  
140 intermittently contributed to no more than two BSI cases per month on Chatinkha. All other ST  
141 identified in Chatinkha over the sampling period were only observed in sporadic single isolate  
142 clusters. From the sequencing analysis alone, it is unclear what exact factors allowed the  
143 specific lineages to persist or successfully transmit within Chatinkha beyond antibiotic selection  
144 and this is under further investigation. Further, continual monitoring of the hospital  
145 environment, especially for the re-emergence of MDR ST340, is urgently needed in order to  
146 implement measures to prevent the persistence and/or spread of these locally untreatable  
147 lineages.

148

149

150

151

152

153

154

155

156

157

158

159

160

161 **\*\*REFERENCES\*\***

- 162 1. Holt KE, Wertheim H, Zadoks RN, et al. Genomic analysis of diversity, population  
163 structure, virulence, and antimicrobial resistance in *Klebsiella pneumoniae*, an urgent  
164 threat to public health. *Proc Natl Acad Sci U S A* **2015**; 112:E3574-81. Available at:  
165 <http://www.ncbi.nlm.nih.gov/pubmed/26100894>. Accessed 1 August 2019.
- 166 2. Stapleton PJ, Murphy M, McCallion N, Brennan M, Cunney R, Drew RJ. Outbreaks of  
167 extended spectrum beta-lactamase-producing Enterobacteriaceae in neonatal intensive  
168 care units: a systematic review. *Arch Dis Child - Fetal Neonatal Ed* **2016**; 101:72–78.  
169 Available at: <http://www.ncbi.nlm.nih.gov/pubmed/26369370>. Accessed 1 August 2019.
- 170 3. Zheng B, Dai Y, Liu Y, et al. Molecular Epidemiology and Risk Factors of Carbapenem-  
171 Resistant *Klebsiella pneumoniae* Infections in Eastern China. *Front Microbiol* **2017**;  
172 8:1061. Available at:  
173 <http://journal.frontiersin.org/article/10.3389/fmicb.2017.01061/full>. Accessed 1 August  
174 2019.
- 175 4. Musicha P, Cornick JE, Bar-Zeev N, et al. Trends in antimicrobial resistance in  
176 bloodstream infection isolates at a large urban hospital in Malawi (1998–2016): a  
177 surveillance study. *Lancet Infect Dis* **2017**; 17.
- 178 5. Diancourt L, Passet V, Verhoef J, Grimont PAD, Brisse S. Multilocus Sequence Typing of  
179 *Klebsiella pneumoniae* Nosocomial Isolates. *J Clin Microbiol* **2005**; 43:4178–4182.  
180 Available at: <http://jcm.asm.org/cgi/doi/10.1128/JCM.43.8.4178-4182.2005>. Accessed 1  
181 August 2019.
- 182 6. Inouye M, Dashnow H, Raven L-A, et al. SRST2: Rapid genomic surveillance for public  
183 health and hospital microbiology labs. *Genome Med* **2014**; 6:90. Available at:  
184 <http://www.ncbi.nlm.nih.gov/pubmed/25422674>. Accessed 1 August 2019.

- 185 7. Carattoli A, Bertini A, Villa L, Falbo V, Hopkins KL, Threlfall EJ. Identification of plasmids  
186 by PCR-based replicon typing. *J Microbiol Methods* **2005**; 63:219–228. Available at:  
187 <http://www.ncbi.nlm.nih.gov/pubmed/15935499>. Accessed 1 August 2019.
- 188 8. Page AJ, Cummins CA, Hunt M, et al. Roary: rapid large-scale prokaryote pan genome  
189 analysis. *Bioinformatics* **2015**; 31:3691–3693. Available at:  
190 <http://www.ncbi.nlm.nih.gov/pubmed/26198102>. Accessed 1 August 2019.
- 191 9. Stamatakis A. RAxML version 8: a tool for phylogenetic analysis and post-analysis of large  
192 phylogenies. *Bioinformatics* **2014**; 30:1312–1313. Available at:  
193 [https://academic.oup.com/bioinformatics/article-](https://academic.oup.com/bioinformatics/article-lookup/doi/10.1093/bioinformatics/btu033)  
194 [lookup/doi/10.1093/bioinformatics/btu033](https://academic.oup.com/bioinformatics/article-lookup/doi/10.1093/bioinformatics/btu033). Accessed 1 August 2019.
- 195 10. Tolentino FM, Bueno MFC, Franscisco GR, et al. Endemicity of the high-risk clone  
196 *klebsiella pneumoniae* st340 coproducing qnrB, ctx-m-15, and kpc-2 in a brazilian  
197 hospital. *Microb Drug Resist* **2019**; 25:528–537. Available at:  
198 <https://pubmed.ncbi.nlm.nih.gov/30543470/>. Accessed 30 June 2020.
- 199 11. Netikul T, Kiratisin P. Genetic characterization of carbapenem-resistant  
200 enterobacteriaceae and the spread of carbapenem-resistant *klebsiella pneumonia* ST340  
201 at a university hospital in Thailand. *PLoS One* **2015**; 10. Available at:  
202 <https://pubmed.ncbi.nlm.nih.gov/26407326/>. Accessed 30 June 2020.
- 203 12. Musicha P, Msefula CL, Mather AE, et al. Genomic analysis of *Klebsiella pneumoniae*  
204 isolates from Malawi reveals acquisition of multiple ESBL determinants across diverse  
205 lineages. *J Antimicrob Chemother* **2019**; 74:1223–1232. Available at:  
206 <https://academic.oup.com/jac/article/74/5/1223/5333166>. Accessed 1 August 2019.
- 207 13. Holt KE, Wertheim H, Zadoks RN, et al. Genomic analysis of diversity, population  
208 structure, virulence, and antimicrobial resistance in *Klebsiella pneumoniae*, an urgent  
209 threat to public health. *Proc Natl Acad Sci U S A* **2015**; 112:E3574-81. Available at:  
210 <http://www.pnas.org/lookup/doi/10.1073/pnas.1501049112>. Accessed 1 August 2019.



- 211 14. Henson SP, Boinett CJ, Ellington MJ, et al. Molecular epidemiology of *Klebsiella*  
212 *pneumoniae* invasive infections over a decade at Kilifi County Hospital in Kenya. *Int J*  
213 *Med Microbiol* **2017**; 307:422–429. Available at:  
214 <http://www.ncbi.nlm.nih.gov/pubmed/28789913>. Accessed 21 November 2019.

215

216

217

218

219

220

221

222

223

224

225

226

227

228

229

230

231 **Figure 1.** Bar chart showing the number of *Klebsiella pneumoniae* positive blood cultures for  
232 Chatinkha ward and other paediatric wards overlaid with a scatter plot showing the total  
233 number of blood cultures (including culture negative) from the paediatric wards at Queen  
234 Elizabeth Central Hospital, Malawi from 2012 – 2015. Data on the total number of blood  
235 cultures taken was not available for 2012 and is not shown.

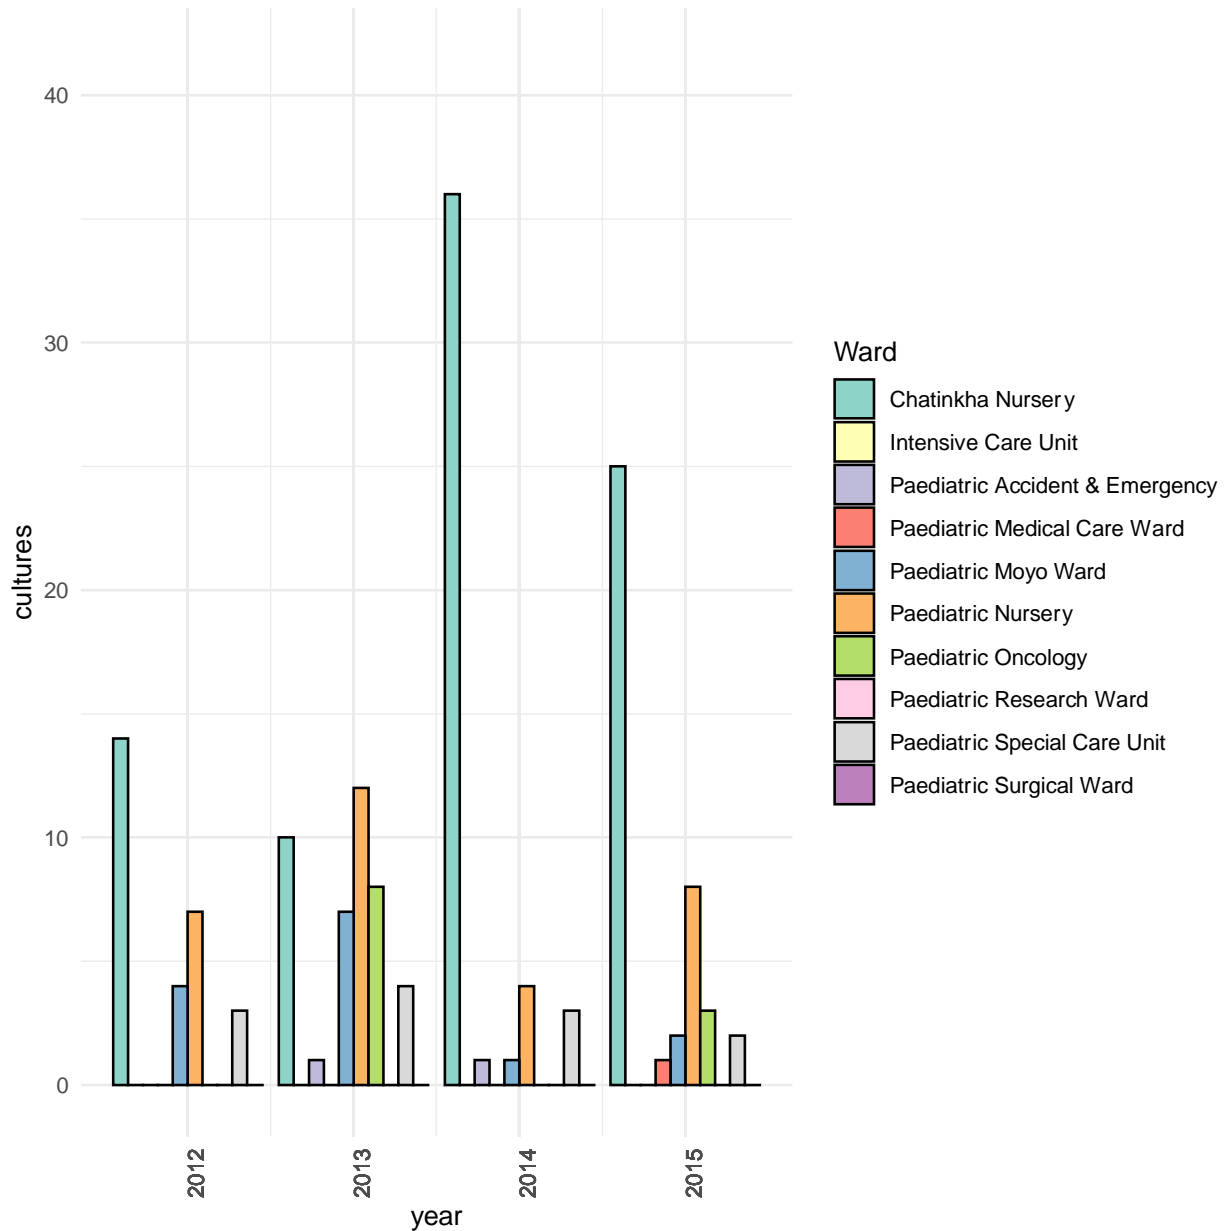

236

237

238 **B. The distribution of antimicrobial resistance elements within the *Klebsiella pneumoniae***  
239 **isolates from Queen Elizabeth Central Hospital.** The phylogeny is based on a core genome SNP  
240 alignment of the Malawian isolates (n=86), the branches are labeled with ST. The panel  
241 adjoining the phylogeny shows the AMR phenotype and the absence/presence of key AMR  
242 genes [*bla*<sub>CTX-M-15</sub>, *bla*<sub>OXA-1</sub>, *bla*<sub>OXA-2</sub>, *bla*<sub>OXA-16</sub>, *bla*<sub>SHV-11</sub>, *bla*<sub>TEM-1</sub> (beta-lactams), *aac*(6')-Ib-cr  
243 (quinolone), *strAB* (streptomycin), *sul1* (sulphonamides), *catA1*, *catA2* (phenicols), *tetA*(D)  
244 (tetracycline), *aadA1*, *aadA2*, *aac*(3')-IIa (aminoglycosides), *dfrA1*, *dfrA2* (trimethoprim) and  
245 *mph* (macrolides)] and plasmids amongst the isolates.

246

247

248

249

250

251

252

253

254

255

256

257

258

259

260 **TECHNICAL APPENDIX**

261 **(\*\*DETAILED METHODS\*\*)**

262 The blood culture and CSF data presented here were collected at QECH, which serves both as  
 263 district hospital for Blantyre and tertiary hospital for the surrounding districts. The hospital  
 264 admits approximately 10,000 adult (aged ≥16 years) and 50,000 pediatric (aged < 16 years)  
 265 medical patients/year. Blood culture collection, processing and antimicrobial susceptibility  
 266 testing methods for these isolates have been previously described [4].

267 **TA1. Schematic showing the location, sequence type (ST) and date of isolation of the *K. pneumoniae***  
 268 ***pneumoniae* isolates that were subjected to whole genome sequencing (n=86).** STs that were  
 269 identified more than once in the dataset are highlighted with a coloured box reflecting the STs.  
 270 Singleton STs are not highlighted. Non-viable isolates (n=4) and those that failed sequencing  
 271 (n=14) but were earlier confirmed as *K. pneumoniae* by the diagnostic laboratory are marked on  
 272 the schematic as 'XXX' in order to give complete picture of the number of BSI *K. pneumoniae*  
 273 cases reported from Chatinkha each month during the study period. Months where no cases  
 274 were reported are omitted from the schematic. The suspected outbreak period is highlighted  
 275 with a black outline.

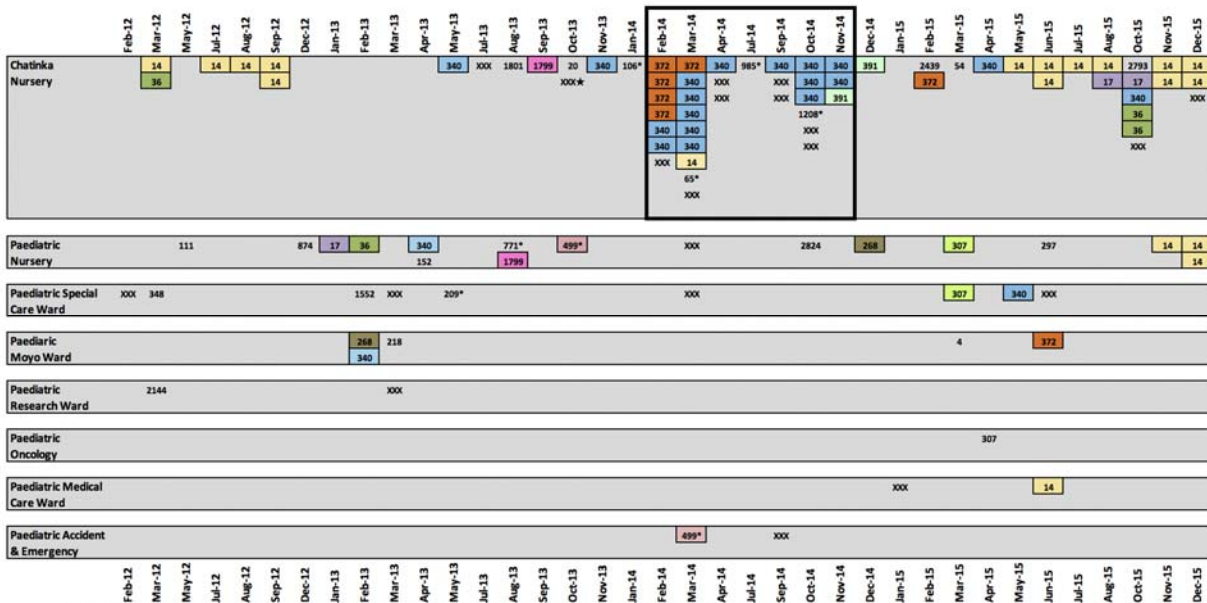

276 \* this is a single locus variant of the given ST ★ A *K. pneumoniae* isolate was recovered from this time point, but was not available for sequencing analysis.

277 **Figure TA2. Heatmap showing the number of SNP differences between the *K. pneumoniae***  
278 **ST340 isolates sequenced as part of the outbreak investigation.** To bring the relatedness of  
279 our samples into context with other ST340 isolates, the analysis includes a community acquired  
280 Malawian ST340 sequenced as part of a previous study at QECH [4], a single ST340 isolate from  
281 a study in Kenya [14], and eight ST340 genomes from the UK [14].

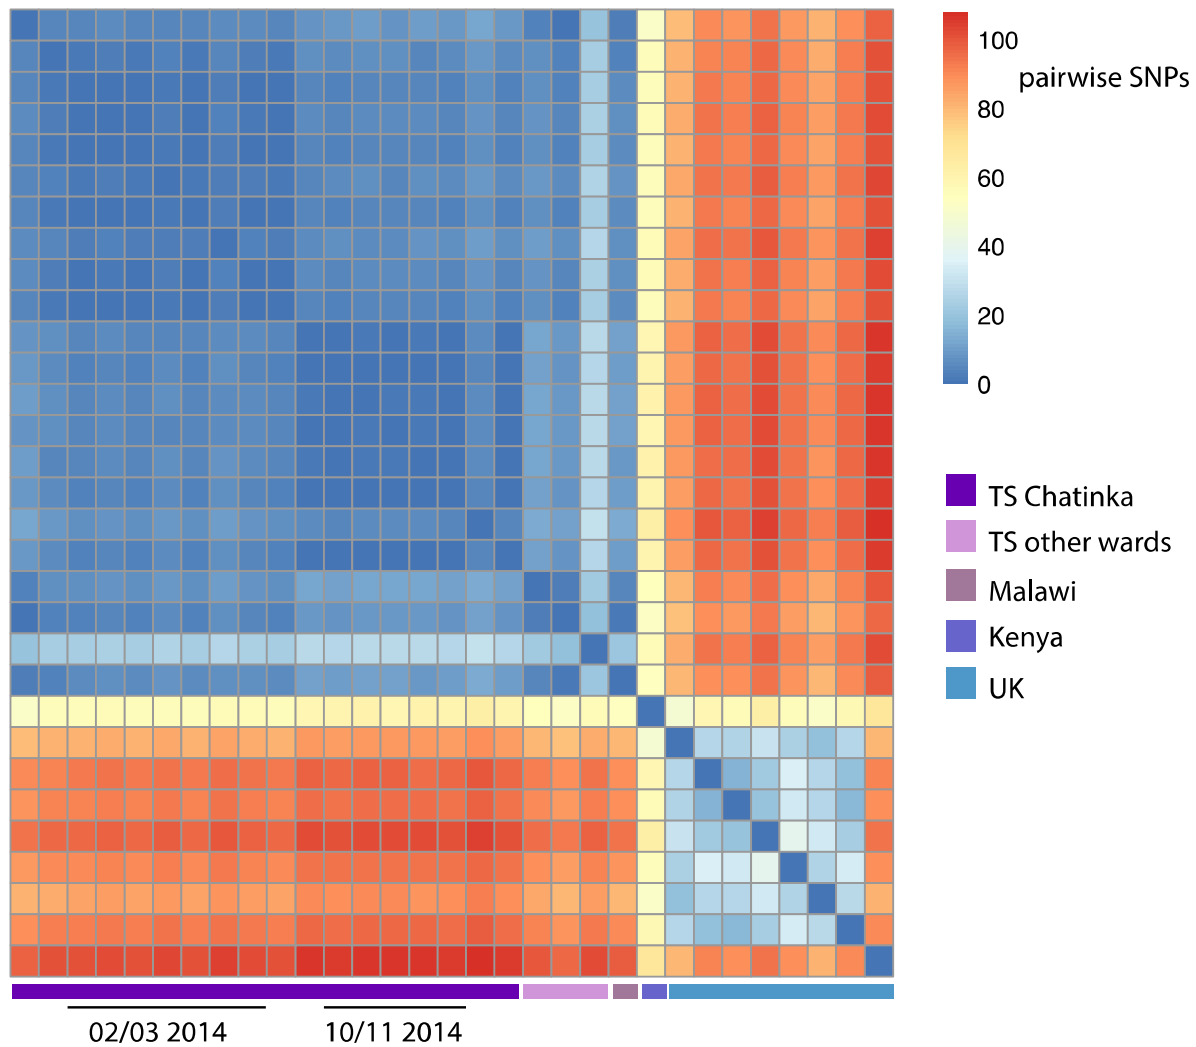

282

283

284

285

286 **Figure TA3. Population structure of *Klebsiella pneumoniae*.** A core genome phylogeny of the  
287 Malawian KP-I isolates (n=81) in the context of a previously published global dataset. Branch  
288 labels are annotated with ST. The inner colored circle indicates if the Malawian isolates were  
289 recovered from the Chatinkha neonatal care unit, the outer ring indicates the country of  
290 isolation.

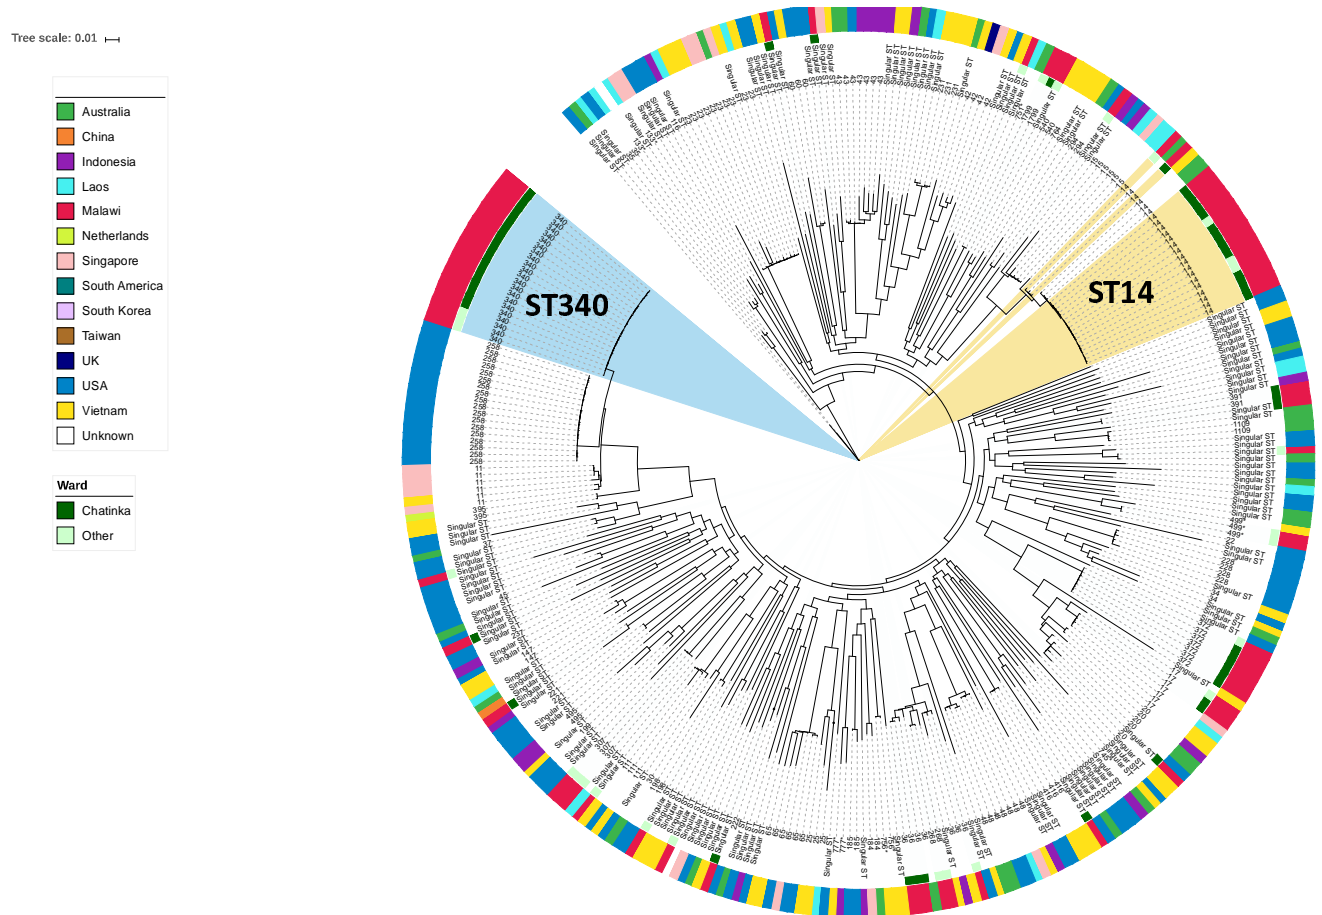

291

292

293

294

295
